# Supplementary material
Source: publisher site journal article supplement (https://www.dovepress.com/article/354926)
Supplement: Supplementary file 1 [file get_supplementary_file.php]

**Supplemental Figure 1**: Directed acyclic graphs (DAGs) used to select covariates


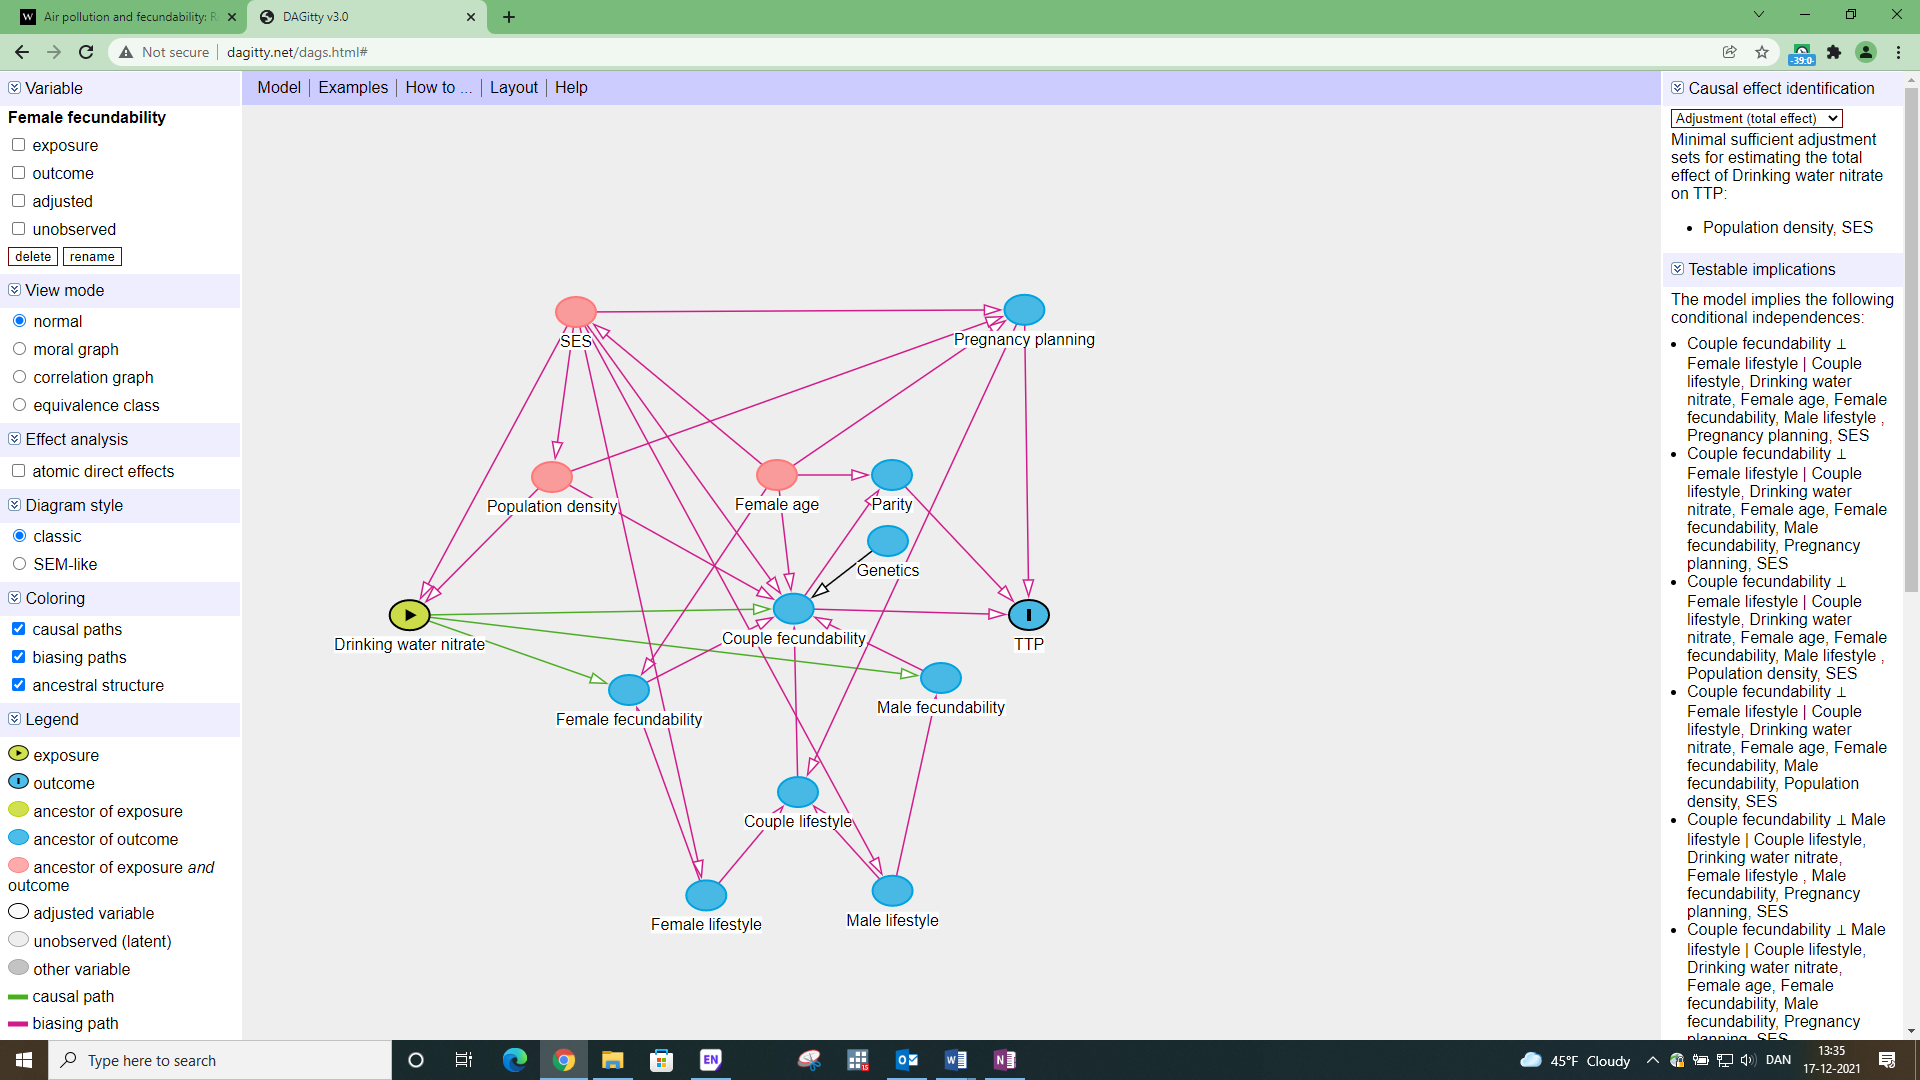


Textor J, van der Zander B, Gilthorpe MS, Liskiewicz M, Ellison GT. 2016. Robust causal inference using directed acyclic graphs: The r package 'dagitty'. Int J Epidemiol 45:1887-1894, PMID:28089956, <https://doi.org/10.1093/ije/dyw341>.

**Supplemental Table 1** Characteristics of the male study population according to long-term drinking water nitrate

|  | | **Nitrate concentration (mg/L)** | | | | |
| --- | --- | --- | --- | --- | --- | --- |
|  | **≤ 1** | | **> 1 - ≤ 2** | **> 2 - ≤ 5** | **> 5 - ≤ 25** | **> 25** |
| **Characteristics** |  | |  |  |  |  |
| Total paternal study populationa, pregnancies, N (%) | 6309 (10.2) | | 13064 (21.1) | 23814 (38.4) | 16849 (27.2) | 1964 (3.2) |
|  |  | |  |  |  |  |
| Age at conception in years, mean (SD) | 31.53 (4.68) | | 32.47 (4.95) | 32.31 (4.84) | 31.88 (4.74) | 31.32 (4.75) |
| Age at conception, n (%) |  | |  |  |  |  |
| <20 years | < 5 (.) | | < 5 (.) | 12 (0.1) | 7 (0.0) | < 5 (.) |
| ≥20-<25 years | >335 (5.3) | | >498 (3.8) | 945 (4.0) | 787 (4.7) | >127 (6.5) |
| ≥25-<30 years | 2224 (35.3) | | 3834 (29.3) | 7139 (30.0) | 5486 (32.6) | 695 (35.4) |
| ≥30-<35 years | 2469 (39.1) | | 5223 (40.0) | 9601 (40.3) | 6724 (39.9) | 747 (38.0) |
| ≥35-≤40 years | 969 (15.4) | | 2569 (19.7) | 4536 (19.0) | 2897 (17.2) | 304 (15.5) |
| >40 years | 304 (4.8) | | 931 (7.1) | 1581 (6.6) | 948 (5.6) | 85 (4.3) |
| Highest education, n (%) |  | |  |  |  |  |
| Primary school | 759 (12.0) | | 1127 (8.6) | 2433 (10.2) | 1915 (11.4) | 260 (13.2) |
| High school or vocational | 3131 (49.6) | | 5170 (39.6) | 10011 (42.0) | 7716 (45.8) | 1012 (51.5) |
| Basic education | 548 (8.7) | | 1015 (7.8) | 1872 (7.9) | 1370 (8.1) | 165 (8.4) |
| Middle education | 967 (15.3) | | 2578 (19.7) | 4599 (19.3) | 2889 (17.1) | 233 (11.9) |
| Higher education or Ph.D. | 682 (10.8) | | 2675 (20.5) | 3992 (16.8) | 2315 (13.7) | 225 (11.5) |
| Missing | 222 (3.5) | | 499 (3.8) | 907 (3.8) | 644 (3.8) | 69 (3.5) |
| Occupation, n (%) |  | |  |  |  |  |
| Unemployedb | 2417 (10.0) | | 2310 (8.8) | 2476 (9.8) | 1235 (11.5) | 322 (11.5) |
| Student | 1833 (7.6) | | 3037 (11.6) | 2422 (9.5) | 772 (7.2) | 194 (6.9) |
| Employee unspecified income | 1765 (7.3) | | 1717 (6.6) | 1685 (6.6) | 810 (7.6) | 226 (8.1) |
| Employee with low income | 8906 (37.0) | | 7471 (28.6) | 8316 (32.8) | 4104 (38.3) | 1055 (37.7) |
| Employee with middle income | 5674 (23.6) | | 6327 (24.2) | 5875 (23.2) | 2300 (21.5) | 576 (20.6) |
| Chief executive or employee with high income | 2627 (10.9) | | 4432 (16.9) | 3772 (14.9) | 1107 (10.3) | 318 (11.3) |
| Owner of business | 431 (1.8) | | 513 (2.0) | 448 (1.8) | 222 (2.1) | 49 (1.7) |
| Other | 397 (1.7) | | 355 (1.4) | 381 (1.5) | 170 (1.6) | 62 (2.2) |
| Population densityc <250 meters, mean number of people (SD) | 596 (773) | | 1052 (1269) | 927 (1186) | 664 (900) | 573 (758) |
| Female smoking in pregnancy, cigarettes/day, n (%) |  | |  |  |  |  |
| Non-smoker | 4571 (72.5) | | 9645 (73.8) | 17304 (72.7) | 12333 (73.2) | 1426 (72.6) |
| Previous smoker in early pregnancy | 500 (7.9) | | 1117 (8.6) | 1954 (8.2) | 1272 (7.5) | 145 (7.4) |
| 1-9 | 462 (7.3) | | 907 (6.9) | 1798 (7.6) | 1337 (7.9) | 162 (8.2) |
| 10-14 | 194 (3.1) | | 407 (3.1) | 841 (3.5) | 658 (3.9) | 89 (4.5) |
| ≥15 | 80 (1.3) | | 219 (1.7) | 513 (2.2) | 366 (2.2) | 39 (2.0) |
| Missing | 502 (8.0) | | 769 (5.9) | 1404 (5.9) | 883 (5.2) | 103 (5.2) |
| Female weekly alcohol consumption, units/week, n (%) |  | |  |  |  |  |
| 0 | 3119 (49.4) | | 6528 (50.0) | 12360 (51.9) | 8784 (52.1) | 1101 (56.1) |
| 0.5-3.5 | 2574 (40.8) | | 5478 (41.9) | 9572 (40.2) | 6860 (40.7) | 722 (36.8) |
| 4-7 | 104 (1.6) | | 263 (2.0) | 441 (1.9) | 291 (1.7) | 32 (1.6) |
| ≥7.5 | 9 (0.1) | | 20 (0.2) | 30 (0.1) | 20 (0.1) | < 5 (.) |
| Missing | 503 (8.0) | | 775 (5.9) | 1411 (5.9) | 894 (5.3) | >101 (5.2) |
| Female body Mass Index, kg/m2, n (%) |  | |  |  |  |  |
| Underweight | 238 (3.8) | | 531 (4.1) | 986 (4.1) | 676 (4.0) | 67 (3.4) |
| Normal weight | 3867 (61.3) | | 8568 (65.6) | 15152 (63.6) | 10385 (61.6) | 1153 (58.7) |
| Overweight | 1143 (18.1) | | 2179 (16.7) | 4207 (17.7) | 3244 (19.3) | 401 (20.4) |
| Obesity | 499 (7.9) | | 839 (6.4) | 1713 (7.2) | 1424 (8.5) | 206 (10.5) |
| Missing | 562 (8.9) | | 947 (7.2) | 1756 (7.4) | 1120 (6.6) | 137 (7.0) |

Note: According to local regulations, single values smaller than five corresponding to participants in the study may not be reported (GDPR, Regulation (EU), 2016/679 of 25 May 2018). In case of numbers below five, pseudo numbers were estimated as the value nearest to the actual count > or < five. aN=62,000. bUnemployed: Social security benefits, disability pension or state education grant. cPopulation density: number of people living 250 meters or less from the female residence at the time of pregnancy, based on distance between geocoded address points from the Residence Database.

| **Supplemental Table 2** Mean difference in Time to pregnancy (days) for the five categories of nitrate exposure compared to the reference group exposed to nitrate below 1 mg/La. n = 70,087 | | |
| --- | --- | --- |
|
| NO3⁻ (mg/L) | Days (95% CI) |  |
| ≤ 1 | Ref (1)b |  |
| > 1 - ≤ 2 | -14.9 (-18.3, -11.5) |  |
| > 2 - ≤ 5 | -12.6 (-16.0, -9.2) |  |
| > 5 - ≤ 25 | -3.0 (-7.4, 1.4) |  |
| > 25 | -1.5 (-9.1, 6.1) |  |
| Note: Linear regression model with robust variance to account for departures for normality. NO3⁻, nitrate concentration in drinking water; CI, confidence interval; Ref, reference. | | |
| aPre-conception exposure: nitrate 2 years prior conception and time to pregnancy above 12 months or MAR treatment. | | |
| bMean time to pregnancy (days) in the reference group was 164.3 days (161.8, 166.8). Months were converted to days by factor 30.42. | | |

| **Supplemental Table 3** Adjusted risk ratios for the association between pre-conception nitrate in drinking water and *medically assisted reproduction (MAR) treatment*, n = 68,819 pregnancies | | | |
| --- | --- | --- | --- |
|
| NO3⁻ (mg/L) | Pregnancies n (%) | MAR n (%)a | aRR (95% CI)b |
| ≤ 1 | 18,622 (27.1) | 1,586 (8.5) | Ref (1) |
| > 1 - ≤ 2 | 20,272 (29.5) | 1,510 (7.4) | 0.92 (0.86, 0.99) |
| > 2 - ≤ 5 | 19,496 (28.3) | 1,431 (7.3) | 0.91 (0.85, 0.98) |
| > 5 - ≤ 25 | 8,229 (12.0) | 639 (7.8) | 0.94 (0.86, 1.02) |
| > 25 | 2,200 (3.2) | 173 (7.9) | 0.91 (0.79, 1.06) |
| Note: Model was fitted using robust variance estimation (VCE) to account for dependencies of pregnancies by the same woman. NO3⁻ = nitrate concentration in drinking water; CI = confidence interval; Ref = reference. | | | |
| aMedically assisted reproduction (MAR) treatment n (% proportion of total). | | | |
| bAdjusted for maternal age, education, occupation, population density and maternal lifestyle (body mass index, smoking and alcohol) at time of conception. | | | |

| **Supplemental Table 4** Adjusted risk ratios for the association between pre-conception nitrate in drinking water and time to pregnancy above 12 months or use of medically assisted reproduction (MAR) treatment. *Including unplanned pregnancies*, n = 80,719 | | | | | | |
| --- | --- | --- | --- | --- | --- | --- |
|
| NO3⁻ (mg/L) | Pregnancies n (%) | | TTP>12 months/MAR n (%)a | | aRR (95% CI)b | |
| ≤ 1 | 21,717 (27.0) | | 6,545 (30.1) | | Ref (1) | |
| >1 - ≤ 2 | 23,701 (29.4) | | 6,659 (28.1) | | 0.95 (0.92, 0.98) | |
| > 2 - ≤ 5 | 23,000 (28.5) | | 6,595 (28.7) | | 0.95 (0.92, 0.97) | |
| > 5 - ≤ 25 | 9,733 (12.1) | | 2,947 (30.3) | | 0.99(0.95, 1.02) | |
| > 25 | 2,568 (3.2) | | 780 (30.4) | | 0.99 (0.93, 1.05) | |
| Note: Model was fitted using robust variance estimation (VCE) to account for dependencies of pregnancies by the same woman. NO3⁻ = nitrate concentration in drinking water; CI = confidence interval; Ref = reference. | | | | | | |
| aTime to pregnancy above 12 months or use of medically assisted reproduction (MAR) treatment including unplanned pregnancies, n (% proportion of total). | | | | | | |
| bAdjusted for maternal age, education, occupation, population density and maternal lifestyle (body mass index, smoking and alcohol) at time of conception. | | | | | | |
| **Supplemental Table 5** Adjusted risk ratios for the association between pre-conception nitrate in drinking water and time to pregnancy above 12 months or use of medically assisted reproduction (MAR) treatment. *Including unplanned pregnancies as reference*, n = 80,719 | | | | | | | |
|
| NO3⁻ (mg/L) | | Pregnancies n (%) | | TTP>12 months/MAR n (%)a | | aRR (95% CI)b | |
| ≤ 1 | | 21,717 (27.0) | | 3,450 (15.9) | | Ref (1) | |
| >1 - ≤ 2 | | 23,701 (29.4) | | 3,230 (13.6) | | 0.94 (0.90, 0.98) | |
| > 2 - ≤ 5 | | 23,000 (28.5) | | 3,091 (13.5) | | 0.91 (0.87, 0.95) | |
| > 5 - ≤ 25 | | 9,733 (12.1) | | 1,443 (14.8) | | 0.95 (0.90, 1.01) | |
| > 25 | | 2,568 (3.2) | | 412 (16.0) | | 0.99 (0.90, 1.08) | |
| Note: Model was fitted using robust variance estimation (VCE) to account for dependencies of pregnancies by the same woman. NO3⁻ = nitrate concentration in drinking water; CI = confidence interval; Ref = reference. | | | | | | | |
| aTime to pregnancy above 12 months or use of medically assisted reproduction (MAR) treatment, n (% proportion of total). Unplanned pregnancies are included in the reference group. | | | | | | | |
| bAdjusted for maternal age, education, occupation, population density and maternal lifestyle (body mass index, smoking and alcohol) at time of conception. | | | | | | | |

| **Supplemental Table 6** Adjusted risk ratios for the association between *male* long-term nitrate in drinking water (50% of the exposure window at residences with a nitrate estimate) and time to pregnancy above 12 months or use of medically assisted reproduction (MAR) treatment. Only adjusted for male covariates, n = 50,018 pregnancies | | | | |
| --- | --- | --- | --- | --- |
| NO3⁻ (mg/L) | Pregnancies n (%) | TTP>12 months/MAR n (%)a | aRR (95% CI)b |
| ≤ 1 | 5,034 (10.1) | 879 (17.5) | Ref (1) |
| >1 - ≤ 2 | 10,535 (21.1) | 1,826 (17.3) | 0.97 (0.90, 1.05) |
| > 2 - ≤ 5 | 19,095 (38.2) | 3,458 (18.1) | 1.01 (0.95, 1.08) |
| > 5 - ≤ 25 | 13,727 (27.4 | 2,372 (17.3) | 0.98 (0.91, 1.05) |
| > 25 | 1,627 (3.3) | 284 (17.5) | 1.00 (0.89, 1.13) |
| Note: Model was fitted using robust variance estimation (VCE) to account for dependencies of pregnancies by the same man. NO3⁻= nitrate concentration in drinking water; CI = confidence interval; Ref = reference. | | | |
| a Time to pregnancy above 12 months or use of medically assisted reproduction (MAR) treatment, n (% proportion of total). bAdjusted for paternal age and education. | | | |

| | **Supplemental Table 7** Adjusted risk ratios for the association between *female* long-term nitrate in drinking water (75% of the exposure window at residences with a nitrate estimate) and time to pregnancy above 12 months or use of medically assisted reproduction (MAR) treatment, n = 45,553 pregnancies | | | | | --- | --- | --- | --- | | | NO3⁻ (mg/L) | Pregnancies n (%) | TTP>12 months/MAR n (%)a | aRR (95% CI)b | | ≤ 1 | 3,285 (7.2) | 526 (16.0) | Ref (1) | | >1 - ≤ 2 | 10,441 (22.9) | 1,706 (16.3) | 0.99 (0.91, 1.08) | | > 2 - ≤ 5 | 17,358 (38.1) | 2,982 (17.2) | 1.01 (0.92, 1.10) | | > 5 - ≤ 25 | 12,794 (28.1) | 2,063 (16.1) | 0.96 (0.88, 1.04) | | > 25 | 1,675 (3.7) | 277 (16.5) | 0.99 (0.87, 1.13) | | Note: Model was fitted using robust variance estimation (VCE) to account for dependencies of pregnancies by the same woman. NO3⁻ = nitrate concentration in drinking water; CI = confidence interval; Ref = reference. | | | | | aTime to pregnancy above 12 months or use of medically assisted reproduction (MAR) treatment, n (% proportion of total). | | | | | bAdjusted for maternal age, education, occupation, population density and maternal lifestyle (body mass index, smoking and alcohol) at time of conception. | | | |  | **Supplemental Table 8** Adjusted risk ratios for the association between *male* long-term nitrate in drinking water (75% of the exposure window at residences with a nitrate estimate) and time to pregnancy above 12 months or use of medically assisted reproduction (MAR) treatment, n=37,113 pregnancies | | | | | --- | --- | --- | --- | | | NO3⁻ (mg/L) | Pregnancies n (%) | TTP>12 months/MAR n (%)a | aRR (95% CI)b | | ≤ 1 | 2,674 (7.2) | 438 (16.4) | Ref (1) | | >1 - ≤ 2 | 8,400 (22.6) | 1,476 (17.6) | 1.07 (0.97, 1.18) | | > 2 - ≤ 5 | 14,021 (37.9) | 2,566 (18.3) | 1.09 (0.99, 1.19) | | > 5 - ≤ 25 | 10,585 (28.5) | 1,788 (16.9) | 1.00 (0.91, 1.11) | | > 25 | 1,433 (3.7) | 246 (17.2) | 1.02 (0.88, 1.17) | | Note: Model was fitted using robust variance estimation (VCE) to account for dependencies of pregnancies by the same man. NO3⁻ = nitrate concentration in drinking water; CI = confidence interval; Ref = reference. | | | | | aTime to pregnancy above 12 months or use of medically assisted reproduction (MAR) treatment, n (% proportion of total). | | | | | bAdjusted for paternal age and education. Maternal population density and maternal lifestyle (body mass index, smoking and alcohol) at time of conception. | | | | |
| --- | --- | --- | --- | --- | --- | --- | --- | --- | --- | --- | --- | --- | --- | --- | --- | --- | --- | --- | --- | --- | --- | --- | --- | --- | --- | --- | --- | --- | --- | --- | --- | --- | --- | --- | --- | --- | --- | --- | --- | --- | --- | --- | --- | --- | --- | --- | --- | --- | --- | --- | --- | --- | --- | --- | --- | --- | --- | --- | --- | --- | --- | --- | --- | --- | --- | --- | --- | --- | --- | --- | --- | --- | --- | --- | --- | --- | --- | --- | --- | --- |

**Supplemental material: Bias analyses**

**Objective**

We aimed to examine the risk of systematic error related to selection of participants into the pregnancy cohort using quantitative bias analyses. Collider stratification bias was considered the largest threat to validity in the study. As illustrated in the Supplemental Figure 2 below, both the exposure and the outcome could well be associated with the possibility of being selected in to the study population.[10](#_ENREF_10), [11](#_ENREF_11)


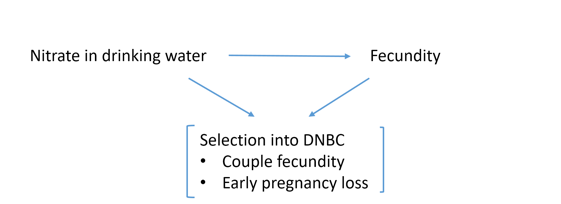


**Supplemental Figure 2** Directed acylic graph illustration of collider stratification bias in the study

**Method**

We studied the potential selection bias in the pre-conception exposure setting and the risk of TTP > 12 months or use of MAR treatment (n=68,819). Values to the bias parameters were assigned according to existing literature and expert knowledge as no internal or external validation data was available.

First, we dichotomized the exposure to drinking water nitrate in two scenarios: 1) the median concentration of 1.9 mg/L NO3- and 2) 10 mg/L NO3-. Carcinogenic effects in humans was found at nitrate in drinking water above 4 mg/L NO3-.[2](#_ENREF_2), but since a biological harmful threshold for nitrate in drinking water and human reproductive health is not well investigated, these chosen cut offs were decided among the group of authors.[12](#_ENREF_12)

Second, we examined different scenarios of selection into the DNBC. Implantation failures and early pregnancy losses have been estimated to account for up to 45% of all human conceptions and would have taken place prior to the enrolment to the DNBC.[13-15](#_ENREF_13) We therefore examined scenarios of 10-45% not being enrolled in the DNBC due to implantation failures and early pregnancy losses.

Third, we assigned the same risk of TTP > 12 months or use of MAR treatment to the reference group of low nitrate level as in the model based on our data. In the highest exposure group (either >1.9 mg/L or >10 mg/L NO3-), we assigned different levels of susceptibility to high nitrate corresponding to increase in risk in the range 10-200% based on different hypotheses of effect modification. Adverse nitrate effects may be due to complex interaction of nitrate intake and endogenous nitrosation factors ie nitrosatable drug intake and the medical condition inflammatory bowel disease decreasing stomach pH.[6](#_ENREF_6), [16-18](#_ENREF_16)

The different bias scenarios are presented in Supplemental Tables 9-12.

**Results**

**Supplemental Table 9** Risk ratios (RR adjusted) calculated in DNBC data, female pre-conception exposure, n = 68,819 pregnancies

**Supplemental Table 10** Example of the calculated risk ratios (RR assumption) in the selection scenarios of different susceptibility to nitrate (10-200%)

**Supplemental Table 11** Example of the calculated combined risk ratios (RR combined) in the selection scenarios of losses prior to enrolment (10-45%) and different susceptibility to nitrate (10-200%)

**Supplemental Table 12** Combined RR estimates of all the different scenarios examined for the bias analyses for the median nitrate dichotomization (1.9 mg/L NO3-)

**Supplemental Table 13** Combined RR estimates of all the different scenarios examined for the bias analyses for the nitrate dichotomization 10 mg/L NO3-

**Discussion**

The bias analyses quantified the potential magnitude of selection bias towards the null. If 30% or more were not enrolled in the DNBC and the hypothesis of effect modification by different factors of 50% or more, the null findings in our study may be due to selection bias.

**References**

**1.** Lash TL, Fox MP, MacLehose RF, Maldonado G, McCandless LC, Greenland S. Good practices for quantitative bias analysis. *Int J Epidemiol.* 2014;43:1969-1985.

**2.** Fink AK, Fox MP, Lash TL. *Applying Quantitative Bias Analysis to Epidemiologic Data*: Springer; 2011.

**3.** Clausen HS, Ebdrup NH, Barsoe IM, et al. Association between Drinking Water Nitrate and Adverse Reproductive Outcomes: A Systematic PRISMA Review. *Water.* 2020;12:2287.

**4.** Schullehner J, Hansen B, Thygesen M, Pedersen CB, Sigsgaard T. Nitrate in drinking water and colorectal cancer risk: A nationwide population-based cohort study. *Int J Cancer.* 2018;143:73-79.

**5.** Macklon NS, Geraedts JP, Fauser BC. Conception to ongoing pregnancy: the 'black box' of early pregnancy loss. *Hum Reprod Update.* 2002;8:333-343.

**6.** Wilcox AJ, Harmon Q, Doody K, Wolf DP, Adashi EY. Preimplantation loss of fertilized human ova: estimating the unobservable. *Hum Reprod.* 2020;35:743-750.

**7.** Wilcox AJ, Weinberg CR, O'Connor JF, et al. Incidence of early loss of pregnancy. *N Engl J Med.* 1988;319:189-194.

**8.** Ward MH, Jones RR, Brender JD, et al. Drinking Water Nitrate and Human Health: An Updated Review. *Int J Environ Res Public Health.* 2018;15.

**9.** Brender JD, Olive JM, Felkner M, Suarez L, Marckwardt W, Hendricks KA. Dietary nitrites and nitrates, nitrosatable drugs, and neural tube defects. *Epidemiology.* 2004;15:330-336.

**10.** Ward MH, deKok TM, Levallois P, et al. Workgroup report: Drinking-water nitrate and health--recent findings and research needs. *Environ Health Perspect.* 2005;113:1607-1614.

**11.** Thomsen AML, Ramlau-Hansen CH, Schullehner J, et al. Prenatal nitrosatable prescription drug intake, drinking water nitrate, and the risk of stillbirth: a register- and population-based cohort of Danish pregnancies, 1997-2017. *Environ Health.* 2021;20:118.
